# Supplementary material
Source: Springer Nature journal article supplement (https://www.springermedizin.de/resource/supplementary/12890_2013_499_MOESM7_ESM.pdf/9505638)

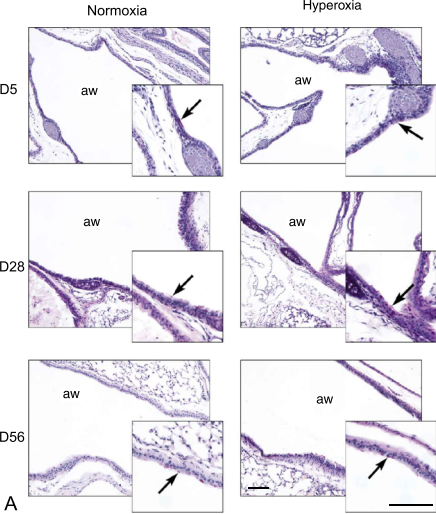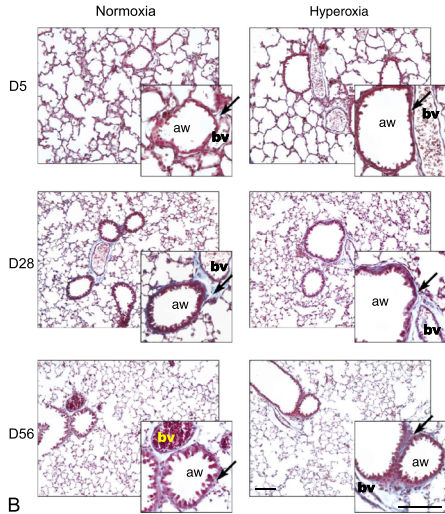

Supplement: MOESM7 [file 9505638]
